# Supplementary material for: Potato Wart Isolates from Europe and North America Form Distinct Clusters of Genetic Variation
Source: Life (Basel). 2023 Sep 8;13(9):1883. doi: 10.3390/life13091883 (PMC10532758; doi:10.3390/life13091883)
Supplement: Supplementary file 1 [file life-13-01883-s001.zip]

Archive with 4 entries (4 files):
- Figure S1 Additional dendrograms.pdf
- Table S1 List of genotypes.xlsx
- Table S2 Primer sequences.xlsx
- Table S3 Scoring pattern of the 73 markers.xlsx
