# Supplementary material for: Potato Wart Isolates from Europe and North America Form Distinct Clusters of Genetic Variation
Source: Life (Basel). 2023 Sep 8;13(9):1883. doi: 10.3390/life13091883 (PMC10532758; doi:10.3390/life13091883)
Supplement: Supplementary file 1 [file life-13-01883-s001.zip › Table S1 List of genotypes.xlsx]

## Sheet: Tabelle1
Genotype	Country	Province	Location	Institution	Source tissue	Cluster
1---40 (BN1)_#DK/12/2015	Denmark	unknown	unknown	IHAR	from fresh warts	C
2---40 (BN1)_#PL/1/2018	Poland	Lesser Poland	Bieńkówka	IHAR	from fresh warts	C
3---8(F1)_#BG/1/2013	Bulgaria	Burgas	Podvis	IHAR	from fresh warts	C
4---41 (P2)_#DK/24/2015	Denmark	unknown	unknown	IHAR	from fresh warts	C
5---2 (Ch1)_#DK/14/2015	Denmark	unknown	unknown	IHAR	from fresh warts	C
6----40(BN1)_#DK/17/2015_#D17	Denmark	unknown	unknown	IHAR	from fresh warts	C
7---40(BN1)_#DK/12/2015_3/2020	Denmark	unknown	unknown	IHAR	from fresh warts	C
8---41 (P2)_#PL/2/2015	Poland	Lesser Poland	Piekielnik	IHAR	from fresh warts	C
9---40 (BN1)_#SE/2/2017	Sweden	unknown	unknown	IHAR	from fresh warts	C
10---40 (BN1)_#PL/2/2018	Poland	Lesser Poland	Niedzica	IHAR	from fresh warts	C
11----2 (Ch1)_#PL/7/2010	Poland	Lesser Poland	Skawica	IHAR	from fresh warts	C
12---40(BN1)_#PL/7/2012	Poland	Lesser Poland	Skawica	IHAR	from fresh warts	C
13---39 (P1)_#PL/69/2009	Poland	Lesser Poland	Piekielnik	IHAR	from fresh warts	C
14----39 (P1)_SE3	Poland	Lesser Poland	Piekielnik	IHAR	from fresh warts	C
15----2(Ch1)_#PL/3/2019	Poland	Lesser Poland	Grywałd	IHAR	from fresh warts	C
16----6(O1)_Baltic	Canada	Prince Edward Island	Baltic	ACIA	from fresh warts	C
17---8(F1)_Avondale	Canada	Avalon Peninsula	Avondale	ACIA	from fresh warts	D
18---6(O1)_St Eleanors (LEV6574)	Canada	Prince Edward Island	Saint Eleanors	ACIA	from fresh warts	D
19---1(D1)_SE1	Germany	North Rhine Westphalia	Arnsberg	JKI	from fresh warts	B
20----1(D1)_#PL/28/2007/2	Poland	Lower Silesia	Mieroszów	IHAR	from fresh warts	B
21---1(D1)_#DE/1/2007/D1	Germany	unknown	unknown	IHAR (from JKI)	from fresh warts	B
22----1(D1)_#PL/28/2007/2_3/2020	Poland	Lower Silesia	Mieroszów	IHAR	from fresh warts	B
23----1(D1)_#DE/1/2007/D1_03/2020	Germany	unknown	unknown	IHAR (from JKI)	from fresh warts	B
24----1(D1)&13(R2)_#UA/5/2020	Ukraine	Transkarpatia	Rachiv-Рахів	IHAR	from soil samples	B
25----40(BN1)_#PL/2/2019	Poland	Lesser Poland	Grywałd	IHAR	from fresh warts	B
26---3(M1)_#PL/3/2013	Poland	Lesser Poland	Zawoja	IHAR	from fresh warts	B
27---3(M1)_#PL/28/2007/1	Poland	Lower Silesia	Mieroszów	IHAR	from fresh warts	B
28----2(G1)_SE10	Germany	Thuringia	Gießübel	JKI	from fresh warts	B
29----2(G1)_#DE/4/2005/G1	Germany	unknown	unknown	IHAR	from fresh warts	B
30----6(O1)_SE12	Germany	North Rhine Westphalia	Olpe	JKI	from fresh warts	B
31---3(M1)_#PL/3/2015	Poland	Lower Silesia	Zawoja	IHAR	from fresh warts	B
32---3(M1)_#PL/3/2015	Poland	Lower Silesia	Zawoja	IHAR	from fresh warts	B
33---6(O1)_#DE/1/2007/O1	Germany	unknown	unknown	IHAR	from fresh warts	B
34---38(Nevsehir)_#GE/1/2021	Georgia	Adjara	Skvana	IHAR	from winter sporangia	B
35----3(M1)&1(D1)_#PL/1/2020	Poland	Kuyavian-Pomerian	Warszewice	IHAR	from soil samples	B
36----2(Ch1)_#AS/II/2020	Poland	Lubuskie	Chromów	IHAR	from fresh warts	F
37---2(Ch1)_#PL/2/2005/Ch1	Poland	Lubuskie	Chromów	IHAR	from fresh warts	F
38----8(F1)_#DK/25/2015	Denmark	unknown	unknown	IHAR	from winter sporangia	A
39---8(F1)_#PL/1/2016	Poland	Lesser Poland	Kuków	IHAR	from fresh warts	A
40----8(F1)_#DK/25/2015_3/2020	Denmark	unknown	unknown	IHAR	from fresh warts	A
41----8(F1)_SE14	Germany	Hesse	Kohlhaus	JKI	from fresh warts	A
42----18(T1)_SE16	Germany	Thuringia	Tannroda	JKI	from fresh warts	A
43---18(T1)_#GR/2/2014	Greece	Drama region East Macedonia	Perithori	IHAR	from fresh warts	A
44----41(P2)_#DK/22/2015	Denmark	unknown	unknown	IHAR	from fresh warts	A
45---8(F1)_#NL/3/2005/F1	Netherlands	unknown	unknown	IHAR	from fresh warts	A
46----8(F1)_#DK/26/2015	Denmark	unknown	unknown	IHAR	from fresh warts	A
47----8(F1)_#SE/1/2017	Sweden	unknown	unknown	IHAR	from fresh warts	A
48----18(Y1)_Yasinia	Ukraine	Transkarpatia	Yasenya-Ясиня	IHAR	from fresh warts	A
49---38(Nevsehir)_#GE/2/2021	Turkey	Nevşehir	Nevşehir	JKI	from winter sporangia	E
50----1(D1)&38(Nevsehir)#GE/3/2021	Georgia	Swanetia	Ushguli	IHAR	from soil samples	E
51---1(D1)_#PL/1/2019	Poland	Lesser Poland	Grywałd	IHAR	from fresh warts	E
Acia: Agriculture and Agri-Food Canada, 960 Carling Avenue, Ottawa, Canada
IHAR: Plant Breeding and Acclimatization Institute - National Research Institute, 05-870, Radzików, Błonie, Poland.
JKI: Julius Kühn-Institut, Federal Research Institute for Cultivated Plants, Stahnsdorfer Damm 81, 14532 Kleinmachnow, Germany
