# Supplementary material for: Potato Wart Isolates from Europe and North America Form Distinct Clusters of Genetic Variation
Source: Life (Basel). 2023 Sep 8;13(9):1883. doi: 10.3390/life13091883 (PMC10532758; doi:10.3390/life13091883)
Supplement: Supplementary file 1 [file life-13-01883-s001.zip › Table S2 Primer sequences.xlsx]

## Sheet: Tabelle1
SSR-marker	Forward-Primer 5´- 3´	Reverse-Primer 5´ - 3´	Reference
SSR 16161	GGCTTCGTCTTCAGCGATAC	CCATCTTCCGGTCTGTTCAT	[15]
SSR 818598	GGCCAGACGTCGATATTTCT	GTACGACCTCCCAGCATTGT	[15]
SSR 4865	CTACAAGCCAGTCACCGTCA	CCACCGAATATCCCATCATC	[15]
SSR 2978	ACGTATGCACGGATCAAACA	TACAACCCCACCTTTTCCTG	[15]
SSR 11176	TGCACTTTGTACCAGCCAAG	TATACCGACCTGTCCAAGCC	[15]
SSR 2	ATTCGCCATTATCTGCAACC	CCGTTGCGCTAGTACTGACA	present study
SSR 4	TCAGCTTTGCTGACGATCTG	ACGCCAACGAATGGTAGAAC	present study
SSR 7	TTGGCAACAAAAGAGCAGTG	CGCCTAGCACAACAACTGAC	present study
SSR 27	ATGTCGGCATTCATGACAAA	GATTGTCCCAAGCCACTGTT	present study
SSR 61	CCAGGCGATCATCCAGTAGT	ACATCCTTGACGGTTCGTTC	present study
SSR 77	CGTGATGGGCTCTTTACGTT	AATGGCTGCTAACCACGAGT	present study
SSR 95	GCACATATGCGTGTTATGCC	ATGCCAAGGGATATGGATGA	present study
Se_29_M13	CAGGAAACAGCTATGACCTTTCTTCTTACGCTGCGGTG	CGAGAAGGTGAGGTCCGATG	[16]
Se_37_M13	CAGGAAACAGCTATGACCAAAGGTTGCAATGACAGGCC	GCGTCAAGGTATCTTTGGGC	[16]
Se_38_M13	CAGGAAACAGCTATGACCGCACCAGTAGCAAGGTTGTC	GAGTGTCTTGCCAATACCGC	[16]
Se_40_M13	CAGGAAACAGCTATGACCATCGCCATGTCTCCTTCCTC	CAGAATATGCACCGCCACTG	[16]
Se_44_M13	CAGGAAACAGCTATGACCGTACGGGTGATTGCAGAACG	AAAGTGCCGGTGTGAACATG	[16]
Se_46_M13	CAGGAAACAGCTATGACCCCGTGGAAATCTTGGATGCC	TCGGTTGCAGATAGGGAGAC	[16]
Se_47_M13	CAGGAAACAGCTATGACCTGACGAGAGACTGCATAGGTC	GGGTGAGTAGGCTGGATGAG	[16]
Se_48_M13	CAGGAAACAGCTATGACCGGAGGTAAGGGTCTGTCTGC	TCTGGCTCCAAAGTCCCTTC	[16]
Se_49_M13	CAGGAAACAGCTATGACCTACCTCGAGCATCAGAGTGC	CGAACCACCTCCTTCAATGC	[16]
Se_60_M13	CAGGAAACAGCTATGACCTATCCTGCTGTGGGTATCGC	CGAGTCGACGGTTCAATTCG	[16]
Se_04_M13	CAGGAAACAGCTATGACCTATCCTGCTGTGGGTATCGC	CGAGTCGACGGTTCAATTCG	[16]
SSR 79482E_3	GAAGAGTCGGAAAGCAGTCG	AATGCTGATCCAAAGCCATC	present study
SSR 284478B_52	TTTGATGTGTCGGAAGACCA	CTCGTATTGTGCAGTTGCGT	present study
SSR 4865A_54	CGATTTTTGGCAGTGGATTT	TCTTTCCCGTTATGGACCAG	present study
SSR 3553_66	AGCCTAAACGCCTGACTGAA	CAACGTCACCTACCACATCG	present study
SSR 79482_108	TAACTGAATTTTCCACGCCC	AATGCTGCAGACTCGGAAGT	present study
SSR 79482_109	ATTAGTGGCAATACGGGCAG	GGTTGCAGATAATGGCGAAT	present study
SSR 79482_111	TCTCGACCTAGATGGGATGG	TGTATCGTTTGAGTGCGTCC	present study
SSR 13452_124	GACTTGGACGACCTGGATGT	ATCCTGGATGGTTGGTTTGA	present study
SCAR E271_P8_P18	CAAGCGCCAACTTCCACATT	TGCTGTACAGTACTTAAAATCGATGC	present study
SSR 14425P1	GGTTGGCAGCGAGCTAGATA	TGAGCTCGTCACTATCATGG	present study
AvrSen1	TCGCATAGTACGGGGGATAG	GTGTGAAGAAAAGCGGAAGC	present study
SSR 122283_F1	GTAAAACGACGGCCAGTCGATGATCAGCAGTTTTAGCC	CAGGAATTGTGGGAAAGCAT	present study
