# Supplementary material for: Potato Wart Isolates from Europe and North America Form Distinct Clusters of Genetic Variation
Source: Life (Basel). 2023 Sep 8;13(9):1883. doi: 10.3390/life13091883 (PMC10532758; doi:10.3390/life13091883)
Supplement: Supplementary file 1 [file life-13-01883-s001.zip › Table S3 Scoring pattern of the 73 markers.xlsx]

## Sheet: Tabelle1
Pathotype	SSR2_1	SSR2_2	SSR2_3	SSR4_1	SSR4_2	SSR7_1	SSR7_2	SSR7_3	SSR27_1	SSR27_2	SSR61_1	SSR61_2	SSR61_3	SSR77_1	SSR77_2	SSR95_1	SSR95_2	SSR16161_1	SSR16161_2	SSR818598_1	SSR818598_2	SSR4865_1	SSR4865_2	SSR2978_1	SSR2978_2	SSR11176_1	SSR11176_2	SSR14425P1	SSR122283P18	AvrSen1	SSR4865A_54_1	SSR4865A_54_2	SSR79482_111_1	SSR79482_111_2	SSR79482_108_1	SSR79482_108_2	SSR79482_109_1	SSR79482_109_2	SSR13452_124_1	SSR13452_124_2	SSR79482E_3_1	SSR79482E_3_2	SSR79482E_3_3	SSR3553_66_1	SSR284478B_52_1	SSR284478B_52_2	SE_04_1	SE_04_2	SE_29_1
1---40 (BN1)_#DK/12/2015	0	1	0	1	0	0	0	1	1	0	0	1	0	0	1	1	0	1	0	0	1	0	1	999	999	1	0	1	0	1	0	1	1	0	1	0	1	0	1	0	1	0	0	1	0	1	1	0	1
2---40 (BN1)_#PL/1/2018	0	1	0	1	0	0	0	1	1	0	0	1	0	0	1	1	0	1	0	999	999	0	1	1	0	1	0	1	0	1	0	1	1	0	1	0	1	0	1	0	1	0	0	1	0	1	1	0	1
3---8(F1)_#BG/1/2013	0	1	0	1	0	0	0	1	1	0	0	1	0	0	1	1	0	1	0	0	1	0	1	1	0	1	0	1	0	1	0	1	1	0	1	0	1	0	1	0	1	0	0	1	0	1	1	0	1
4---41 (P2)_#DK/24/2015	0	1	0	1	0	0	0	1	1	0	0	1	0	0	1	1	0	1	0	0	1	0	1	999	999	1	0	1	0	0	0	1	1	0	1	0	1	0	1	0	1	0	0	1	0	1	1	0	1
5---2 (Ch1)_#DK/14/2015	0	1	0	1	0	0	0	1	1	0	0	1	0	0	1	1	0	1	0	0	1	0	1	1	0	1	0	1	0	1	0	1	1	0	1	0	1	0	1	0	1	0	0	1	0	1	1	0	1
6----40(BN1)_#DK/17/2015_#D17	0	1	0	1	0	0	0	1	1	0	0	1	0	0	1	1	0	1	0	0	1	0	1	1	0	1	0	1	0	1	0	1	1	0	1	0	1	0	1	0	1	0	0	1	0	1	1	0	1
7---40(BN1)_#DK/12/2015_3/2020	0	1	0	1	0	0	0	1	1	0	0	1	0	0	1	1	0	1	0	0	1	0	1	1	0	1	0	1	0	1	0	1	1	0	1	0	1	0	1	0	1	0	0	1	0	1	1	0	1
8---41 (P2)_#PL/2/2015	0	1	0	1	0	0	0	1	1	0	0	1	0	0	1	1	0	1	0	0	1	0	1	1	0	1	0	1	0	1	0	1	1	0	1	0	1	0	1	0	1	0	0	1	0	1	1	0	1
9---40 (BN1)_#SE/2/2017	0	1	0	1	0	0	0	1	1	0	0	1	0	1	0	1	0	1	0	0	1	0	1	1	0	1	0	1	0	1	0	1	1	0	1	0	1	0	1	0	1	0	0	1	0	1	1	0	1
10---40 (BN1)_#PL/2/2018	0	1	0	1	0	0	0	1	1	0	0	1	0	0	1	0	1	1	0	0	1	0	1	1	0	1	0	1	0	1	0	1	1	0	1	0	1	0	1	0	1	0	0	1	0	1	1	0	1
11----2 (Ch1)_#PL/7/2010	0	1	0	1	0	0	0	1	1	0	0	1	0	0	1	0	1	1	0	0	1	0	1	1	0	1	0	1	0	1	0	1	1	0	1	0	1	0	1	0	1	0	0	1	0	1	1	0	1
12---40(BN1)_#PL/7/2012	0	1	0	1	0	0	0	1	0	1	0	1	0	0	1	1	0	1	0	0	1	0	1	1	0	1	0	1	0	1	0	1	1	0	1	0	1	0	1	0	1	0	0	1	0	1	1	0	1
13---39 (P1)_#PL/69/2009	0	1	0	1	0	0	0	1	0	1	0	0	1	0	1	0	1	1	0	0	1	0	1	1	0	1	0	1	0	1	0	1	1	0	1	0	1	0	1	0	1	0	0	1	0	1	1	0	1
14----39 (P1)_SE3	0	1	0	1	0	0	0	1	0	1	0	0	1	1	0	1	0	1	0	0	1	0	1	1	0	1	0	1	0	1	0	1	1	0	1	0	1	0	1	0	1	0	0	1	0	1	1	0	1
15----2(Ch1)_#PL/3/2019	0	1	0	1	0	0	0	1	1	0	1	0	0	0	1	1	0	1	0	0	1	0	1	1	0	1	0	1	0	1	0	1	1	0	1	0	1	0	1	0	1	0	0	1	1	0	1	0	1
16----6(O1)/8(F1)_Baltic	0	1	0	1	0	0	0	1	1	0	1	0	0	0	1	1	0	1	0	0	1	0	1	0	1	1	0	1	0	1	0	1	1	0	1	0	1	0	1	0	1	0	0	1	0	1	1	0	1
17---8(F1)_Avondale	0	1	0	1	0	0	1	0	1	0	1	0	0	0	1	1	0	1	0	0	1	0	1	0	1	1	0	1	0	1	0	1	1	0	1	0	1	0	1	0	1	0	0	1	0	1	1	0	1
18---6(O1)_St Eleanors (LEV6574)	0	1	0	1	0	0	0	1	1	0	1	0	0	0	1	1	0	1	0	0	1	0	1	0	1	1	0	1	0	1	0	1	1	0	1	0	1	0	1	0	1	0	0	1	0	1	1	0	0
19---1 (D1)_SE1	1	0	0	0	1	0	0	1	1	0	0	1	0	0	1	1	0	1	0	0	1	0	1	1	0	1	0	1	0	1	0	1	0	1	0	1	0	1	0	1	0	0	1	1	0	1	1	0	1
20----1 (D1)_#PL/28/2007/2	1	0	0	1	0	0	0	1	1	0	0	1	0	0	1	1	0	1	0	0	1	0	1	1	0	1	0	0	0	1	0	1	0	1	0	1	0	1	0	1	0	0	1	1	0	1	1	0	1
21---1 (D1)_#DE/1/2007/D1	1	0	0	0	1	0	0	1	1	0	0	1	0	0	1	1	0	1	0	0	1	0	1	1	0	1	0	1	0	1	0	1	0	1	0	1	0	1	0	1	0	0	1	0	0	1	1	0	1
22----1(D1)_#PL/28/2007/2_3/2020	1	0	0	0	1	0	0	1	1	0	0	1	0	1	0	1	0	1	0	0	1	0	1	1	0	1	0	0	0	1	0	1	0	1	0	1	0	1	0	1	0	0	1	0	0	1	1	0	1
23----1(D1)_#DE/1/2007/D1_03/2020	1	0	0	1	0	0	0	1	1	0	0	1	0	1	0	1	0	1	0	0	1	0	1	1	0	1	0	1	0	1	0	1	0	1	0	1	0	1	0	1	0	0	1	1	0	1	1	0	1
24----1(D1)&13(R2)_#UA/5/2020	1	0	0	1	0	0	0	1	999	999	0	0	1	0	1	1	0	1	0	0	1	0	1	1	0	1	0	1	0	1	0	1	0	1	0	1	0	1	1	0	0	0	1	1	1	0	1	0	1
25----40(BN1)_#PL/2/2019	1	0	0	1	0	0	1	0	1	0	0	0	1	0	1	1	0	1	0	0	1	0	1	0	1	1	0	1	0	1	0	1	0	1	0	1	0	1	1	0	0	0	1	1	0	1	1	0	1
26---3 (M1)_#PL/3/2013	1	0	0	1	0	0	1	0	1	0	0	1	0	0	1	1	0	1	0	0	1	0	1	0	1	1	0	1	0	1	0	1	0	1	0	1	0	1	1	0	0	0	1	1	0	1	1	0	1
27---3 (M1)_#PL/28/2007/1	1	0	0	1	0	0	1	0	1	0	0	1	0	1	0	1	0	1	0	0	1	0	1	0	1	1	0	1	0	1	0	1	0	1	0	1	0	1	1	0	0	0	1	1	0	1	1	0	1
28----2 (G1)_SE10	1	0	0	0	1	0	1	0	0	1	0	0	1	0	1	1	0	1	0	0	1	0	1	1	0	1	0	0	0	1	0	1	0	1	0	1	0	1	1	0	0	0	1	0	0	1	1	0	1
29----2 (G1)_#DE/4/2005/G1	1	0	0	0	1	0	1	0	0	1	0	0	1	0	1	1	0	1	0	0	1	0	1	1	0	1	0	0	0	1	0	1	0	1	0	1	0	1	1	0	0	0	1	0	0	1	1	0	1
30----6 (O1)_SE12	1	0	0	0	1	0	0	1	0	1	0	0	1	1	0	1	0	1	0	0	1	0	1	1	0	1	0	0	0	1	0	1	0	1	0	1	0	1	0	1	0	0	1	0	1	0	1	0	1
31---3(M1)_#PL/3/2015	1	0	0	0	1	0	0	1	0	1	0	0	1	1	0	1	0	1	0	0	1	0	1	1	0	1	0	0	0	1	0	1	0	1	0	1	0	1	0	1	0	0	1	0	1	0	1	0	1
32---3 (M1)_#PL/3/2015	1	0	0	0	1	0	0	1	0	1	0	0	1	0	1	1	0	1	0	0	1	0	1	1	0	1	0	0	0	1	0	1	0	1	0	1	0	1	0	1	0	0	1	0	1	0	1	0	1
33---6 (O1)_#DE/1/2007/O1	1	0	0	0	1	0	0	1	0	1	0	0	1	0	1	0	1	1	0	0	1	0	1	1	0	1	0	0	0	1	0	1	0	1	0	1	0	1	0	1	0	0	1	0	1	0	1	0	1
34---38 (Nevsehir)_#GE/1/2021	1	0	0	0	1	0	1	0	1	0	0	0	1	0	1	1	0	1	0	0	1	0	1	0	1	1	0	1	0	1	0	1	0	1	0	1	0	1	1	0	0	0	1	999	0	1	1	0	1
35----3(M1)&1(D1)_#PL/1/2020	1	0	0	1	0	0	0	1	1	0	0	0	1	0	1	1	0	1	0	0	1	0	1	1	0	1	0	1	0	1	0	1	0	1	0	1	0	1	1	0	0	0	1	999	1	0	1	0	1
36----2 (Ch1)_#AS/II/2020	0	0	1	0	1	0	0	1	1	0	1	0	0	0	1	1	0	1	0	0	1	0	1	1	0	1	0	0	0	0	0	1	1	0	1	0	1	0	1	0	0	1	0	0	1	0	1	0	1
37---2 (Ch1)_#PL/2/2005/Ch1	0	0	1	0	1	0	0	1	1	0	0	1	0	0	1	0	1	1	0	0	1	0	1	1	0	1	0	0	0	0	0	1	1	0	1	0	1	0	1	0	0	1	0	0	1	0	1	0	1
38----8 (F1)_#DK/25/2015	0	0	1	0	1	0	0	1	1	0	0	1	0	0	1	0	1	0	1	1	0	1	0	0	1	0	1	0	1	0	1	0	1	0	1	0	999	999	1	0	0	1	0	1	0	1	1	0	0
39---2 (Ch1)/ 8 (F1)_#PL/1/2016	0	0	1	0	1	0	0	1	1	0	0	1	0	1	0	1	0	0	1	1	0	1	0	0	1	0	1	0	1	0	1	0	1	0	1	0	1	0	1	0	0	1	0	1	0	1	1	0	0
40----8(F1)_#DK/25/2015_3/2020	0	0	1	0	1	0	0	1	1	0	0	1	0	0	1	0	1	0	1	1	0	1	0	0	1	0	1	0	1	0	1	0	1	0	1	0	1	0	1	0	0	1	0	0	0	1	1	0	0
41----8 (F1)_SE14	0	0	1	1	0	1	0	0	1	0	0	1	0	0	1	0	1	0	1	1	0	1	0	0	1	0	1	0	1	0	1	0	1	0	1	0	1	0	1	0	0	1	0	0	0	1	0	1	0
42----18 (T1)_SE16	0	0	1	1	0	1	0	0	1	0	0	1	0	0	1	0	1	0	1	1	0	1	0	0	1	0	1	0	1	0	1	0	1	0	1	0	1	0	1	0	0	1	0	0	0	1	0	1	0
43---18 (T1)_#GR/2/2014	0	0	1	1	0	1	0	0	1	0	0	1	0	0	1	1	0	0	1	1	0	1	0	0	1	0	1	0	1	0	1	0	1	0	1	0	1	0	1	0	0	1	0	0	0	1	0	1	0
44----41 (P2)_#DK/22/2015	0	0	1	1	0	1	0	0	1	0	0	1	0	0	1	1	0	0	1	1	0	1	0	0	1	0	1	0	1	0	0	1	1	0	1	0	1	0	1	0	0	1	0	0	0	1	0	1	0
45---8 (F1)_#NL/3/2005/F1	0	0	1	1	0	1	0	0	1	0	0	1	0	0	1	0	1	0	1	1	0	1	0	0	1	0	1	0	1	0	1	0	1	0	1	0	1	0	1	0	0	1	0	0	1	0	0	1	0
46----8 (F1)_#DK/26/2015	0	1	0	1	0	1	0	0	1	0	0	1	0	0	1	0	1	0	1	1	0	1	0	0	1	0	1	0	1	0	1	0	999	999	1	0	999	999	1	0	0	999	999	0	1	0	0	1	0
47----8 (F1)_#SE/1/2017	0	0	1	1	0	1	0	0	1	0	0	1	0	0	1	0	1	0	1	1	0	1	0	0	1	0	1	0	1	0	0	1	1	0	1	0	1	0	1	0	0	1	0	0	0	1	0	1	0
48----18 (Y1)_Yasinia	0	0	1	1	0	1	0	0	1	0	0	1	0	0	1	0	1	0	1	1	0	1	0	0	1	0	1	0	1	0	1	0	1	0	1	0	1	0	1	0	0	1	0	0	0	1	0	1	0
49---38 (Nevsehir)_#GE/2/2021	0	0	1	1	0	0	0	1	1	0	0	1	0	0	1	1	0	1	0	0	1	0	1	1	0	1	0	1	0	1	0	1	0	1	1	0	1	0	1	0	0	1	0	999	0	1	1	0	1
50----1(D1)&38(Nevsehir)#GE/3/2021	0	0	1	0	1	0	0	1	1	0	0	1	0	0	1	1	0	1	0	0	1	0	1	1	0	1	0	1	0	1	0	1	0	1	1	0	1	0	1	0	0	1	0	999	0	1	1	0	1
51---1(D1)_#PL/1/2019	0	0	1	0	1	0	0	1	1	0	0	1	0	0	1	1	0	1	0	0	1	0	1	1	0	1	0	1	0	1	0	1	0	1	1	0	1	0	1	0	0	1	0	999	0	1	1	0	1
Scoring:
0 = marker allele absent
1 = marker alle present
999 = missing data
[truncated: 24 more columns]
